# Supplementary material
Source: PubMed Central journal article supplement (PMC7655342)
Supplement: 18-00714.pdf [file 18-00714.pdf]

**On-line Table: Summary of patients with DVAs and VMs**

| Patient No. | Age (yr)/Sex | VM Location                                                                                          | DVA Location                                                                                                                                | No. of DVAs | DVA Drainage         | Same Metamere? | Other Information                                                                                                           |
|-------------|--------------|------------------------------------------------------------------------------------------------------|---------------------------------------------------------------------------------------------------------------------------------------------|-------------|----------------------|----------------|-----------------------------------------------------------------------------------------------------------------------------|
| 1           | 49/F         | Left frontal, temporal, zygomaticomaxillary, nasal, and mandibular regions                           | Left basal ganglia, temporal lobe, and cerebellum                                                                                           | 3           | Deep                 | Yes            | Probable CVMS 1-3                                                                                                           |
| 2           | 27/F         | Left frontal, orbital, nasal, and masticator space                                                   | Bilateral cerebellar hemispheres, bilateral basal ganglia, left temporal lobe, left frontoparietal white matter, inferior left frontal lobe | 7           | Deep                 | Yes            | Probable CVMS 1-3, multiple cavernomas, de novo DVA-associated basal ganglia cavernoma with moderate contralateral weakness |
| 3           | 57/F         | Right orbit                                                                                          | Right basal ganglia                                                                                                                         | 1           | Deep                 | No             |                                                                                                                             |
| 4           | 32/F         | Left orbit, bilateral lips                                                                           | Right basal ganglia, left frontoparietal white matter                                                                                       | 2           | Deep                 | Yes            | Sturge-Weber, left cerebral atrophy                                                                                         |
| 5           | 57/F         | Right submandibular                                                                                  | Left frontal white matter                                                                                                                   | 1           | Deep                 | No             |                                                                                                                             |
| 6           | 31/F         | Right lip                                                                                            | Right middle cerebellar peduncle                                                                                                            | 1           | Superficial          | Yes            |                                                                                                                             |
| 7           | 28/F         | Left zygomaticomaxillary and masticator space                                                        | Bilateral cerebellar hemispheres, left frontal lobe, and left parietal lobe                                                                 | 5           | Deep and superficial | Yes            | Probable CVMS 1 + 3                                                                                                         |
| 8           | 21/F         | Right frontal and zygomaticomaxillary region, right globe                                            | Right cerebellar hemisphere, vermis, right temporal lobe, right occipital lobe                                                              | 4           | Deep and superficial | Yes            | Form fruste Sturge-Weber/CVMS 1 + 2                                                                                         |
| 9           | 36/F         | Right mandibular, zygomaticomaxillary, orbital, and frontal                                          | Deep left white matter                                                                                                                      | 1           | Deep                 | No             | DVA-associated cavernoma                                                                                                    |
| 10          | 48/F         | Left frontal, zygomaticomaxillary, masticator space, nasal                                           | Left temporal                                                                                                                               | 1           | Deep                 | Yes            |                                                                                                                             |
| 11          | 41/F         | Bilateral masticator space, right orbit, right oral mucosa, right frontal                            | Bilateral cerebellar hemispheres, midpons, bilateral basal ganglia, right temporal lobe, right frontal lobe                                 | 7           | Deep and superficial | Yes            | CVMS, intracranial hypotension                                                                                              |
| 12          | 23/F         | Right orbit, right frontal, right masticator space, bilateral cavernous sinuses, bilateral calvarial | Right frontal, right cerebellar                                                                                                             | 2           | Deep                 | Yes            | CVMS 2 + 3, form fruste Sturge-Weber with cortical calcification and choroid plexus enlargement                             |
